# Supplementary material
Source: publisher site journal article supplement (https://www.dovepress.com/get_supplementary_file.php?f=%20245197.pdf)
Supplement: Supplementary file 1 [file get_supplementary_file.php]

Table e1. Reduction in OFF time and increases in good ON time (ON without troublesome dyskinesia) from the 4 randomized controlled studies (istradefylline versus placebo) that led to FDA approval.

| Week                                 | Placebo Good ON | Istradefylline<br>20 mg/day<br>Good ON | Istradefylline<br>40 mg/day<br>Good ON | Placebo<br>OFF | Istradefylline<br>20 mg/day<br>OFF | Istradefylline<br>40 mg/day<br>OFF |
|--------------------------------------|-----------------|----------------------------------------|----------------------------------------|----------------|------------------------------------|------------------------------------|
| <b>Change from Baseline Study 1</b>  |                 |                                        |                                        |                |                                    |                                    |
| 2                                    | 0.22 ± 2.81     | -                                      | 1.57 ± 2.47                            | -0.37 ± 2.76   | -                                  | -1.92 ± 2.58                       |
| 4                                    | 0.56 ± 2.28     | -                                      | 1.4 ± 2.9                              | -0.91 ± 2.20   | -                                  | -1.63 ± 2.88                       |
| 8                                    | 0.17 ± 2.54     | -                                      | 1.49 ± 2.85                            | -0.52 ± 2.36   | -                                  | -1.58 ± 2.85                       |
| 12                                   | 0.51 ± 2.68     | -                                      | 1.58 ± 2.87                            | -0.69 ± 2.67   | -                                  | -1.86 ± 2.64                       |
| <b>Change from Baseline Study 2*</b> |                 |                                        |                                        |                |                                    |                                    |
| 2                                    | 0.21            | 0.91                                   | -                                      | -0.47 ± 2.27   | -1.46 ± 2.43                       | -                                  |
| 4                                    | 0.64            | 1.02                                   | -                                      | -0.65 ± 2.44   | -1.49 ± 3.08                       | -                                  |
| 8                                    | 0.87            | 1.42                                   | -                                      | -1.25 ± 1.21   | -1.65 ± 3.05                       | -                                  |
| 12                                   | 1.10            | 1.4                                    | -                                      | -1.05 ± 2.53   | -1.57 ± 3.16                       | -                                  |
| <b>Change from Baseline Study 3</b>  |                 |                                        |                                        |                |                                    |                                    |
| 2                                    | 0.45 ± 1.92     | 0.86 ± 2.04                            | 0.83 ± 1.91                            | -0.47 ± 1.78   | -0.99 ± 1.83                       | -1.06 ± 1.79                       |
| 4                                    | 0.66 ± 2.10     | 1.11 ± 2.03                            | 1.15 ± 2.40                            | -0.67 ± 1.79   | -1.25 ± 1.76                       | -1.22 ± 2.09                       |
| 8                                    | 0.53 ± 2.42     | 1.22 ± 2.31                            | 1.19 ± 2.70                            | -0.46 ± 2.14   | -1.25 ± 2.00                       | -1.35 ± 2.53                       |
| 12                                   | 0.81 ± 2.48     | 1.4 ± 2.29                             | 1.28 ± 2.80                            | -0.78 ± 2.08   | -1.45 ± 2.03                       | -1.46 ± 2.69                       |
| <b>Change from Baseline Study 4</b>  |                 |                                        |                                        |                |                                    |                                    |
| 2                                    | 0.23 ± 1.55     | 0.86 ± 1.85                            | 0.83 ± 2.15                            | -0.34 ± 1.59   | -0.77 ± 1.67                       | -0.78 ± 1.87                       |
| 4                                    | 0.36 ± 1.57     | 1.08 ± 2.30                            | 1.05 ± 2.13                            | -0.41 ± 1.64   | -0.89 ± 2.06                       | -1.03 ± 1.83                       |
| 8                                    | 0.54 ± 2.07     | 1.00 ± 2.57                            | 1.35 ± 2.20                            | -0.48 ± 2.28   | -1.04 ± 2.21                       | -1.00 ± 2.12                       |
| 12                                   | 0.25 ± 2.55     | 1.26 ± 2.37                            | 1.05 ± 2.48                            | -0.3 ± 2.45    | -1.20 ± 1.89                       | -0.95 ± 2.16                       |

\*Data are LS mean for good ON in Study 2
